# Supplementary material
Source: PubMed Central journal article supplement (PMC10254978)
Supplement: NIHMS1724370-supplement-1.pdf [file NIHMS1724370-supplement-1.pdf]

## ONLINE REPOSITORY

**TABLE E1.** Epinephrine requirement for failed challenges

|          | Level    | No epinephrine<br>(n = 46) | Epinephrine<br>(n = 48) | <i>P</i> value |
|----------|----------|----------------------------|-------------------------|----------------|
| Food (%) | Almond   | 2 (66.7)                   | 1 (33.3)                | .5347          |
|          | Cashew   | 14 (40)                    | 21 (60)                 |                |
|          | Hazelnut | 7 (53.8)                   | 6 (46.2)                |                |
|          | Walnut   | 23 (53.4)                  | 20 (46.6)               |                |

Number (percent) of failed challenges that required epinephrine and did not require epinephrine are shown for each nut. The percent represents the percent that required (or did not require) epinephrine out of the total number of failed challenges for a specific tree nut.

**TABLE E2.** Epinephrine requirement for failed challenges separated by allergic comorbidities

|                          | No epinephrine (n = 74) | Epinephrine (n = 64) | <i>P</i> value |
|--------------------------|-------------------------|----------------------|----------------|
| Eczema, n (%)            |                         |                      |                |
| No                       | 39 (53.4)               | 38 (59.4)            | .4768          |
| Yes                      | 34 (46.6)               | 26 (40.6)            |                |
| Asthma, n (%)            |                         |                      |                |
| No                       | 49 (67.1)               | 40 (62.5)            | .5624          |
| Yes                      | 24 (32.9)               | 24 (37.5)            |                |
| Allergic rhinitis, n (%) |                         |                      |                |
| No                       | 35 (47.9)               | 23 (35.9)            | .1394          |
| Yes                      | 38 (52.1)               | 41 (64.1)            |                |

Characterization of patients who failed oral food challenge and either required or did not require epinephrine.

**TABLE E3.** Predicted probabilities for failing a challenge separated by tree nut

| Tree nut | Predicted probability | Corresponding value of IgE at OFC |
|----------|-----------------------|-----------------------------------|
| Almond   | 0.25                  | 64.816                            |
|          | 0.50                  | 92.771                            |
|          | 0.95                  | 167.693                           |
| Cashew   | 0.25                  | -0.717                            |
|          | 0.50                  | 3.347                             |
|          | 0.95                  | 14.241                            |
| Hazelnut | 0.25                  | -31.461                           |
|          | 0.50                  | -84.791                           |
|          | 0.95                  | -227.725                          |
| Walnut   | 0.25                  | -0.557                            |
|          | 0.50                  | 2.842                             |
|          | 0.95                  | 11.952                            |

OFC, Oral food challenge.
